# Supplementary material
Source: PubMed Central journal article supplement (PMC2529092)
Supplement: 0711861105_0711861105SI.pdf [file 0711861105_0711861105SI.pdf]

# Supporting Information

Qiao et al 10.1073/pnas.0711861105

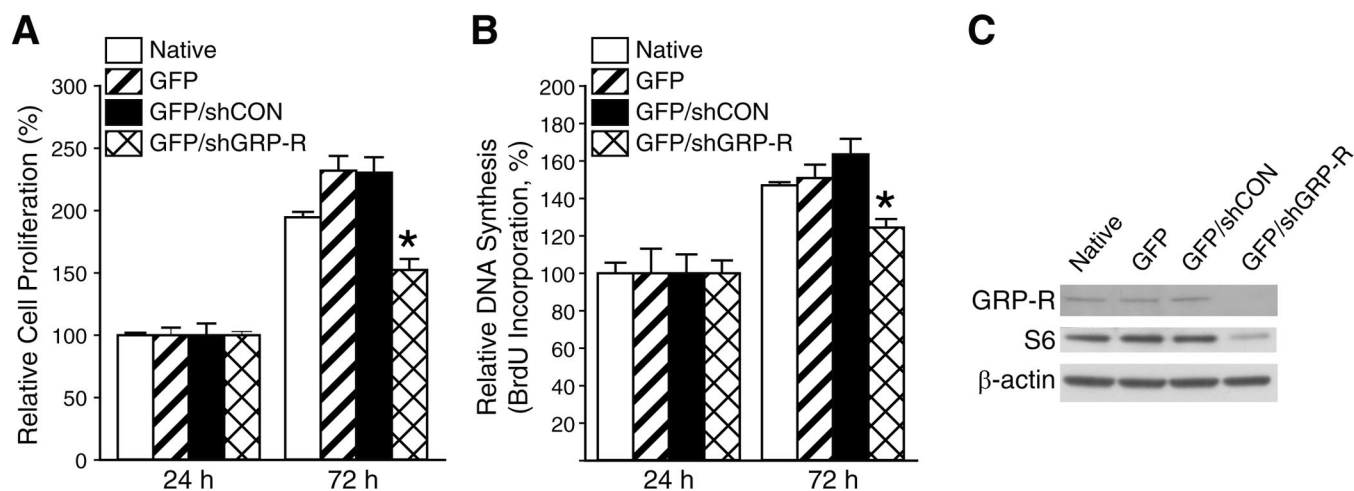

**Fig. S1.** Comparison of transfected versus native BE(2)-C cells. (A) BE(2)-C cells (native, expressing GFP, shGRP-R, or shCON) were plated  $4 \times 10^3$  cells/well and cell proliferation was measured (data represent mean  $\pm$  SEM; \* $P < 0.02$  vs. native, GFP, or shCON). (B) DNA synthesis was analyzed by measuring the BrdU incorporation (data represent mean  $\pm$  SEM; \* $P < 0.02$  vs. native, GFP, or shCON). (C) Western blot analysis was performed with GRP-R and S6 antibodies;  $\beta$ -actin was used as a loading control.



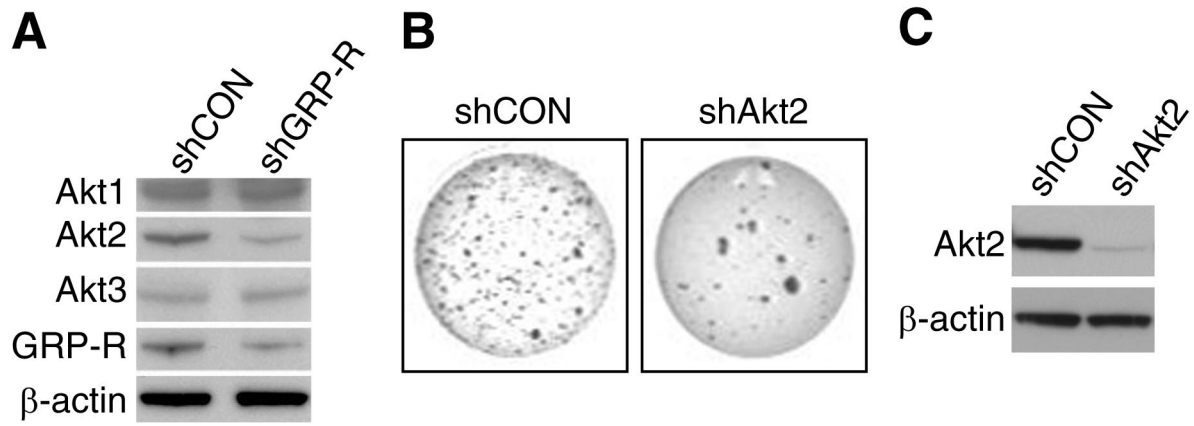

**Fig. 53.** Akt2 is regulated by GRP-R and shAkt2 decreases anchorage-independent growth. (A) Western blot analysis of Akt isoforms, Akt1, Akt2, and Akt3 in BE(2)-C cells expressing shCON or shGRP-R. Akt2 expression alone was down-regulated by shGRP-R. (B) BE(2)-C cells expressing either shAkt2 or shCON were plated in soft agar ( $2.5 \times 10^3$  cells/well) for 3 weeks. (C) Western blots confirm inhibition of Akt2 protein levels after stable transfection.
